# Supplementary material
Source: Royal Society of Chemistry journal article supplement (https://www.rsc.org/suppdata/cc/1999/2487/904525b.doc)
Supplement: Supplementary file 1 [file 904525b.doc]

**Synthesis of [RuII(dmbpy)2(di-(TEMPO-V2+)-bpy)]6+•6Cl–**

The synthesis and characterization of the precursor [RuII(dmbpy)2(di-V2+-bpy)]6+ complex, where L is the carboxypropyl terminated bis-viologen ligand was performed from Ru(dmbpy)2Cl2 and the corresponding ligand by reported procedures.[[1]](#footnote-2) The TEMPO-labeled complex was prepared by dissolving 1.0x10–5 mol [RuII(dmbpy)2(di-V2+-bpy)]6+ in 10 mL DMF followed by the addition of 2.25x10–5 mol dicyclohexylcarbodiimide (DCC) using N-hydroxysuccinimide as a catalyst. The reaction mixture was stirred under argon at 40 oC for 24 hrs. A stoichiometric amount of solid 4-amino-TEMPO was added to the warm mixture and was stirred for an additional 24 hrs. Solid dicyclohexylurea (CDU) was removed by filtration (white crystals) and the crude product was collected following high vacuum removal of DMF. The TEMPO-labeled complex was purified by HPLC using reported procedures and conditions for similar TEMPO-Ru(II) complexes with an yield of 27% based on the starting Ru(dmbpy)2Cl2 complex.[[2]](#footnote-3) [RuII(dmbpy)2(di-(TEMPO-V2+)-bpy)]6+•6Cl– was obtained from the acetate salt collected from the HPLC using Amberlite-15 as an ion exchange medium and was eluted with 0.05 M HCl. Electrospray MS shows peaks at m/z = 815 for [Ru(dmbpy)2(di-(TEMPO-V2+)-bpy)•6Cl]2+, and the peaks at m/z = 692 and 520 correspond to the +2 species after the loss of one and two TEMPO units, respectively.

# Redox potentials

The reduction and oxidation potentials measured for [RuII(phen)2(TEMPO-phen)]2+ and [RuII(dmbpy)2(di-(TEMPO-V2+)-bpy)]6+ are listed in Table S1, along with the assignments for each observed wave. The HPLC trace showing the separation of the pure [RuII(dmbpy)2(di-(TEMPO-V2+)-bpy)]6+ compound is shown in Figure S1 with the appropriate labels for each eluted compound. The electrospray MS for the pure [RuII(dmbpy)2(di-(TEMPO-V2+)-bpy)]6+ complex is shown in Figure S2, and the main fragmentation patterns are indicated in Figure S3a–c. An MM2 molecular model of [RuII(dmbpy)2(di-(TEMPO-V2+)-bpy)]6+ is shown in Figure S4.

# EPR Spectra

The EPR spectra were calculated by a well-established procedure (D. J. Schneider, J. H. Freed in *Biological Magnetic Resonance. Spin Labeling. Theory and Applications.* (Eds.: L. J. Berliner, J. Reuben) Plenum Press, New York, Vol. 8, 1989, p.1), from which the correlation time for the rotational diffusion motion, tc, and the Heisenberg spin-spin exchange frequency, Wex, were obtained.

1. Y.-Z. Hu, S. H. Bossmann, D. v. Loyen, O. Schwarz, H. Dürr, *Eur. J. Chem.* 1999, **5**, 1137. [↑](#footnote-ref-2)
2. S. H. Bossmann, N. D. Ghatlia, M. F. Ottaviani, C. Turro, H. Dürr, N. J. Turro, *Synthesis* 1996, 1313. [↑](#footnote-ref-3)
